# Supplementary material
Source: PubMed Central journal article supplement (PMC3155174)
Supplement: mmc1.pdf [file mmc1.pdf]

## Supplemental Data

### Recessive Mutations in *DOCK6*, Encoding the Guanidine Nucleotide Exchange Factor DOCK6, Lead to Abnormal Actin Cytoskeleton Organization and Adams-Oliver Syndrome

Ranad Shaheen, Eissa Faqeih, Asma Sunker, Heba Morsy, Tarfa Al-Sheddi, Hanan E. Shamseldin, Nouran Adly, Mais Hashem, and Fowzan S. Alkuraya

Table S1

List of novel coding variants identified in the autozygome of individual 1 (synonymous missense changes were excluded)

| Name of the gene | Reference Sequence | Nucleotide level   | Protein level    |
|------------------|--------------------|--------------------|------------------|
| <i>PSMD3</i>     | NM_002809.2        | c.1282T>G          | p.Leu428Val      |
| <i>ZNF844</i>    | NM_001136501.1     | c.698C>A           | p.Ala233Asp      |
| <i>DOCK6</i>     | NM_020812.2        | c.1362_1365delAACT | p.Thr455Serfs*24 |

Figure S1

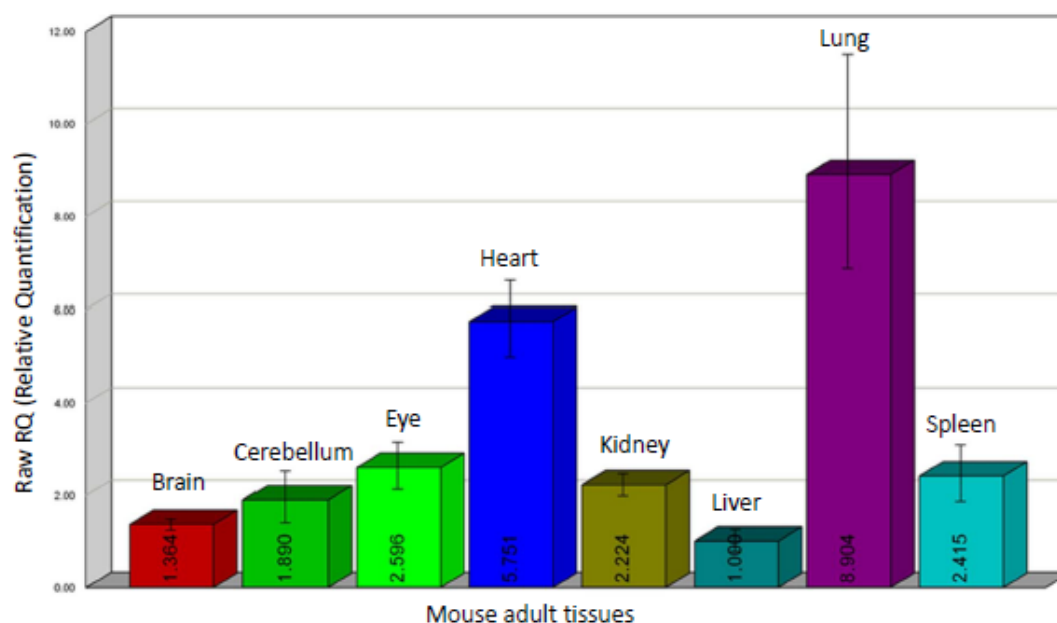

Relative Expression of *Dock6* in adult mouse tissues by qRT-PCR. Data represent the mean ( $\pm$ SD) of triplicate analysis on an arbitrary scale (y axis) representing expression relative to the housekeeping gene  $\beta$ -actin.
